# Supplementary material for: Interpreting inorganic compositional depth profiles to understand the rate-limiting step in vapor phase infiltration processes
Source: Royal Society of Chemistry journal article supplement (doi:10.1039/d3cp01517c), 2023-01-01
Supplement: d3cp01517c1.pdf [file d3cp01517c1.pdf]

## Interpreting Inorganic Compositional Depth Profiles to Understand the Rate-Limiting Step in Vapor Phase Infiltration Processes

Shuaib A. Balogun<sup>1</sup>, Yi Ren<sup>2</sup>, Ryan P. Lively<sup>2</sup> and Mark D. Losego<sup>1,\*</sup>

<sup>1</sup>*School of Materials Science and Engineering, Georgia Institute of Technology, Atlanta, GA, USA*

<sup>2</sup>*School of Chemical and Biomolecular Engineering, Georgia Institute of Technology, Atlanta, GA, USA*

\*[electronic mail: losego@gatech.edu](mailto:losego@gatech.edu)

### Supporting Information

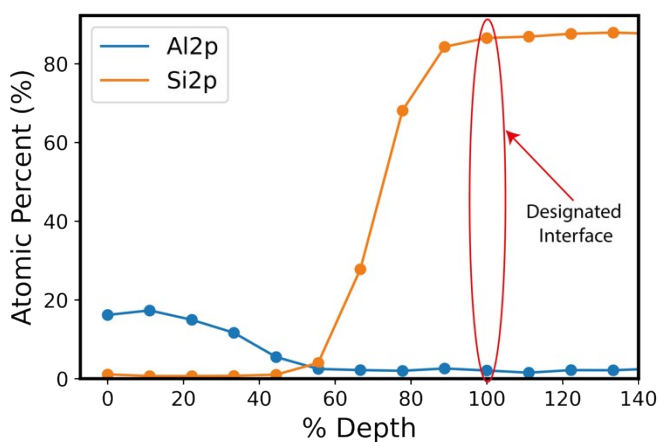

Figure S1: XPS depth profile used to determine infiltration depth of inorganic precursor. 100% depth is chosen as the point where the silicon signal plateaus.
